# Supplementary material
Source: publisher figshare collection journal article supplement (https://acs.figshare.com/ndownloader/files/3789571)
Supplement: Supplementary file 1 [file 3789571]

# The Elastic Mechanical Response of Nanoscale Thin Films of Miscible Polymer/Polymer Blends

*Peter C. Chung and Peter F. Green\**

Department of Materials Science and Engineering, Biointerfaces Institute, University of Michigan, Ann Arbor, MI 48109, United States

## **Supporting Information:**

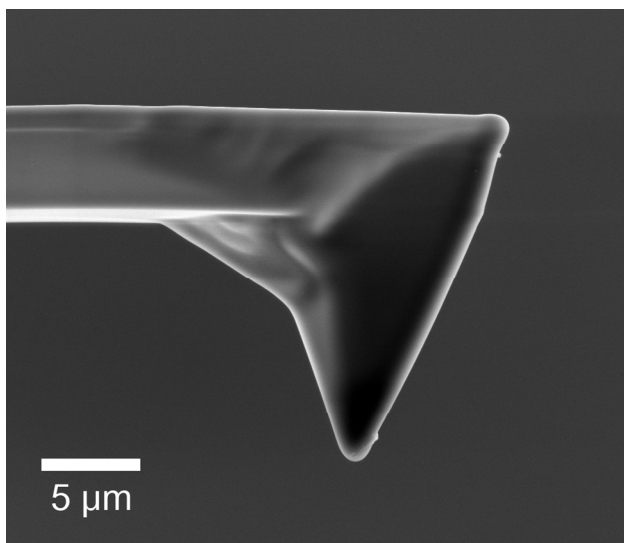

**Figure S1.** A SEM micrograph of the hemispherical AFM tip used in the current study.

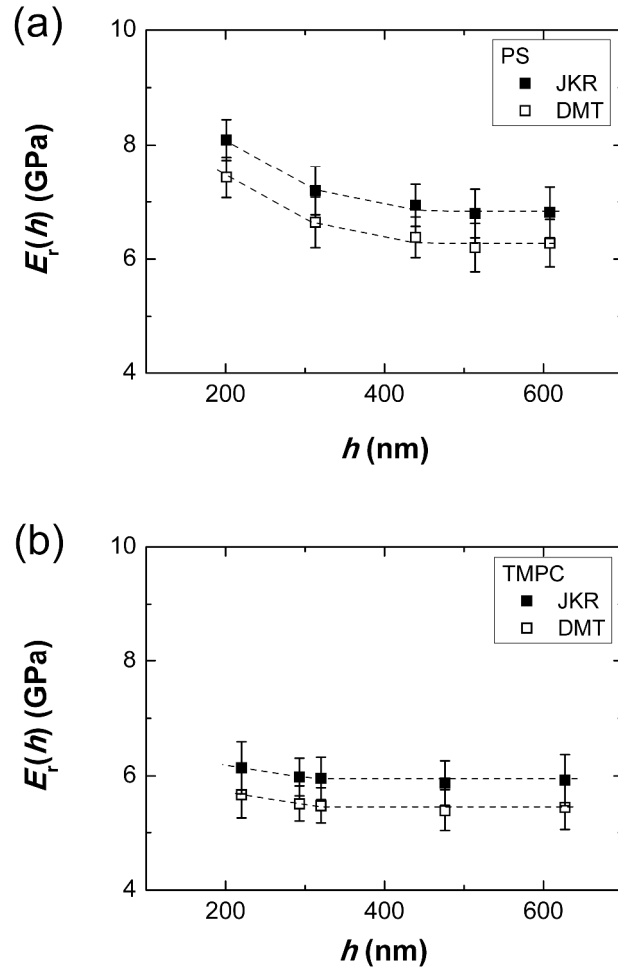

**Figure S2.** Effective reduced moduli,  $E_r(h)$ , for (a) polystyrene and (b) tetramethyl bisphenol-A polycarbonate estimated by fitting force-distance curves with two different elastic contact models; the JKR (filled squares) and the DMT (open squares). The maximum force,  $F_{\max}$ , was kept at a constant value of 400 nN for all the measurements. Each data point is an average of 15 nanoindentation measurements and dashed lines are guides for the eyes.
